# Supplementary material for: Signaling of Macrophage Inflammatory Protein (MIP)-3β Facilitates Dengue Virus-Induced Microglial Cell Migration
Source: MDPI journal article supplement (doi:10.3390/v10120690), 2018-12-05

Supplementary File 1

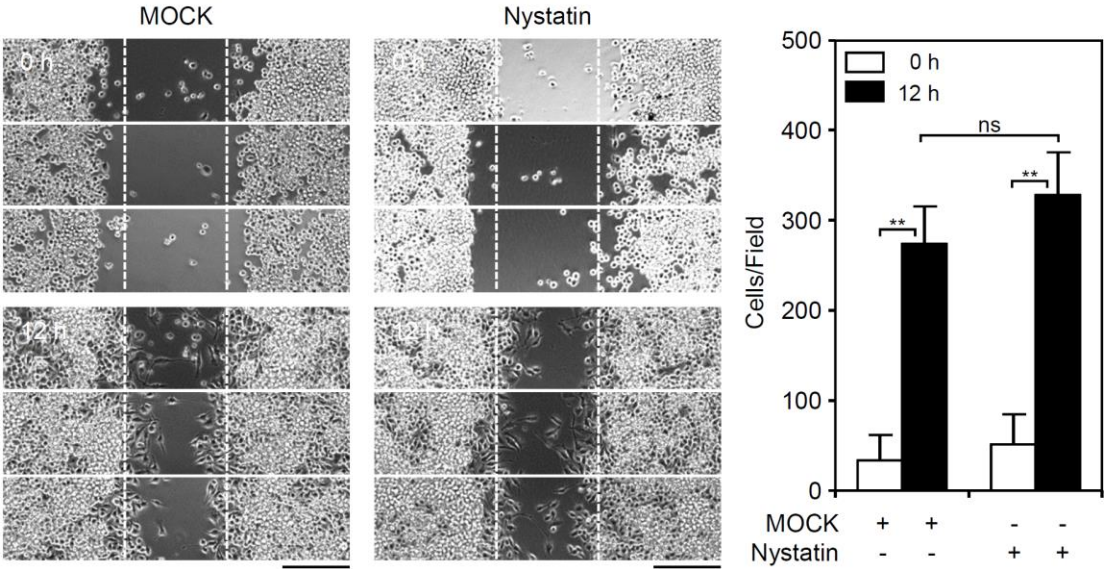

Supplement: s1 [file s1]
